# Supplementary material for: In situ generation of hydrogen peroxide using a schwertmannite/nickel foam catalyst for enhanced heterogenous Fenton degradation of dye wastewater
Source: Royal Society of Chemistry journal article supplement (doi:10.1039/d5ra09613h), 2026-01-01
Supplement: d5ra09613h1.xlsx [file d5ra09613h1.xlsx]

## Sheet: Fig3a,b,c,d, Fig.4a,b Fig.5a
	Fig.3a										Fig. 4a						Fig.5a
																			ck		methanol		furfuryl alchohol		KH2PO4
											Time (min)	H2O2 (mg/L)	error bar					Time (min)	degradation rate of RhB	error bar	degradation rate of RhB	error bar	degradation rate of RhB	error bar	degradation rate of RhB	error bar
											0	0	0					0	0	0	0	0	0	0	0	0
		RhB		NF		sch/NF					10	2.75676	0.57333					5	61.6837	2.10665	3.3039	0.3684	5.16904	4.7421	15.7081	3.49575
	Time (min)	degradation rate of RhB	error bar	degradation rate of RhB	error bar	degradation rate of RhB	error bar				20	4.1982	1.21036					10	84.2088	3.93222	8.43148	5.04767	7.51007	4.25213	19.3394	1.31882
	0	0	0	0	0	0	0				30	9.51351	0.19111					15	98.2141	1.34234	10.7499	4.22607	9.39748	3.71129	34.7167	5.81492
	5	0.931929	0.446956	16.6613	0.893911	66.9449	6.86478				40	9.69369	0.0637033					20	99.6078	0.11385	13.6944	4.69743	11.4031	2.64428	83.5209	2.38755
	10	2.6013	0.126064	29.3355	4.17159	93.3225	2.10871											30	100	0	16.629	5.61331	15.2858	3.48712	99.4163	0.52967
	15	3.35494	0.458416	41.5478	3.58711	98.3225	0.378193				Fig.4b
	30	5.51053	1.35233	69.3355	3.69025	100	0
											Time (min)	Fe2+ (mg/L)	error bar	total Fe (mg/L)	error bar
	Fig.3b										0	0	0	0	0
											5	0.13941	0.05633	1.42724	0.02112
		pH = 2		pH =3		pH = 4					10	0.11949	0.04694	1.75916	0.03051
	Time (min)	degradation rate of RhB	error bar	degradation rate of RhB	error bar	degradation rate of RhB	error bar				15	0.1726	0.06572	2.34002	0.03755
	0	0	0	0	0	0	0				20	0.21243	0.08449	3.07023	0.08449
	3	61.6836	2.10665	24.0136	1.95822	8.79472	1.37714				30	0.23234	0.01878	4.14896	0.07745
	5	84.2088	3.93222	41.9929	1.60714	11.3232	1.03299
	10	98.2141	1.34234	77.1081	3.35539	9.52724	4.35913
	15	99.6078	0.113846	85.3796	5.58288	9.49081	0.119898
	20	100	0	88.7643	4.92129	9.9722	0.431187
	30	100	0	91.2839	3.50398	11.1003	0.770311
	Fig.3c
		20 mg/L		40 mg/L		60 mg/L		80 mg/L
	Time (min)	degradation rate of RhB	error bar	degradation rate of RhB	error bar	degradation rate of RhB	error bar	degradation rate of RhB	error bar
	0	0	0	0	0	0	0	0	0
	3	61.6836	2.10665	28.326	0.73657	7.58936	5.0758	3.6697	0.334474
	5	84.2088	3.93222	72.0062	1.05556	53.8749	1.55861	7.29108	0.327281
	10	98.2141	1.34234	89.407	5.22558	84.7659	2.32142	33.7674	6.68948
	15	99.6078	0.113846	95.6365	2.78388	93.9647	0.717456	56.8232	2.65421
	20	100	0	98.864	0.585776	97.545	0.643237	93.5787	2.03921
	Fig.3d
		50rpm		100rpm		180rpm
	Time (min)	degradation rate of RhB	error bar	degradation rate of RhB	error bar	degradation rate of RhB	error bar
	0	0	0	0	0	0	0
	5	43.9781	9.29045	43.8078	7.3194	62.4819	0.973553
	10	65.146	0.774205	76.6174	1.43774	94.221	1.89587
	15	84.854	2.06455	86.6913	0.784222	98.2156	0.550826
	20	94.7993	2.70972	97.1349	1.69915	100	0
	30	99.0876	0.774205	99.7782	0.0522815	100	0

## Sheet: ,Fig.S3a,b,Fig.S4a,b, Fig.S5
	Fig. S3a							Fig.S4a					Fig.S5
			dark		light									1st		2nd		3th
		Time(min)	degradation rate of RhB	error bar	degradation rate of RhB	error bar		Time(min)	CFe2+ (mg/L)	error bar			Time(min)	degradation rate of RhB	error bar	degradation rate of RhB	error bar	degradation rate of RhB	error bar
		0	0	0	0	0		0	0	0			0	0	0	0	0	0	0
		3	61.6836	2.10665	33.5822	2.87554		5	0.13941	0.00563			3	61.6836	2.10665	12.0126	3.17375	5.62221	0.279228
		5	84.2088	3.93222	53.323	1.74398		10	0.11949	0.00469			5	84.2088	3.93222	16.29	1.72445	6.07984	0.636905
		10	98.2141	1.34234	90.4684	1.42367		15	0.1726	0.00657			10	98.2141	1.34234	21.4721	0.874249	6.28377	0.61168
		15	99.6078	0.113846	99.604	0.0379317		20	0.21243	0.00845			15	99.6078	0.113846	22.5452	2.32297	6.58928	0.705981
		20	100	0	100	0		30	0.23234	0.00188			20	100	0	29.0634	5.99848	6.64891	0.645568
	Fig. S3b							Fig.S4b					30	100	0	34.3123	5.50342	6.70841	0.633205
			a piece of Sch/NF		two pieces of Sch/NF
		Time(min)	degradation rate of RhB	error bar	degradation rate of RhB	error bar		Time(min)	degradation rate of RhB	error bar
		0	0	0	0	0		0	0	0.15944
		3	51.9925	5.78069	71.1989	4.35366		5	11.1612	0
		5	87.9853	2.67266	91.9617	1.35447		10	11.0485	0.15944
		10	97.4004	0.773984	99.6836	0.205589		15	11.8377	0.31888
		15	98.9653	0.907012	99.8888	0.0362805		20	10.7103	1.2755
								30	11.9504	0.15944
